# Supplementary material for: Preliminary characterization and immunomodulatory activity of polysaccharide fractions from litchi pulp
Source: Royal Society of Chemistry journal article supplement (doi:10.1039/c6ra20505d), 2016-01-01

Supplementary Figure 1. FT-IR spectra of the LPI (A) and LPII (B).

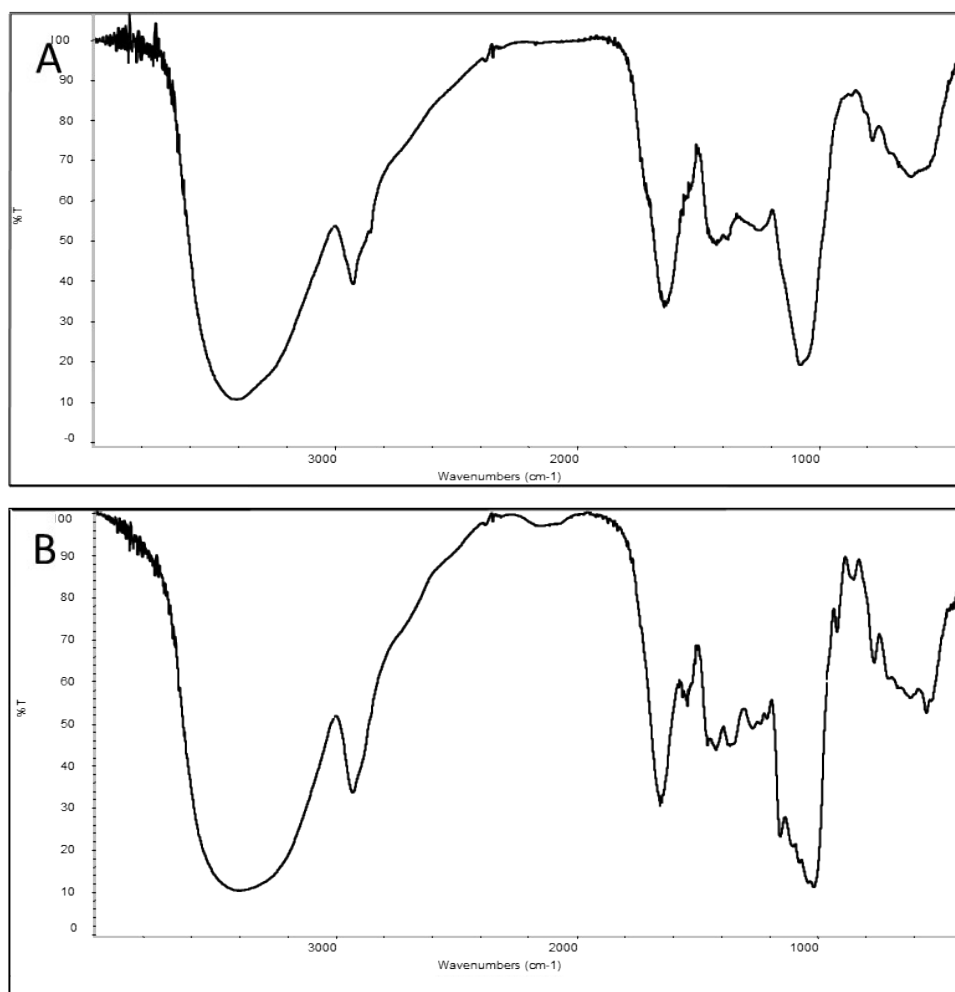

Supplementary Figure 2. GC-MS spectra of litchi polysaccharides: (A) standard sample; (B) LPI ; (C) LPII.

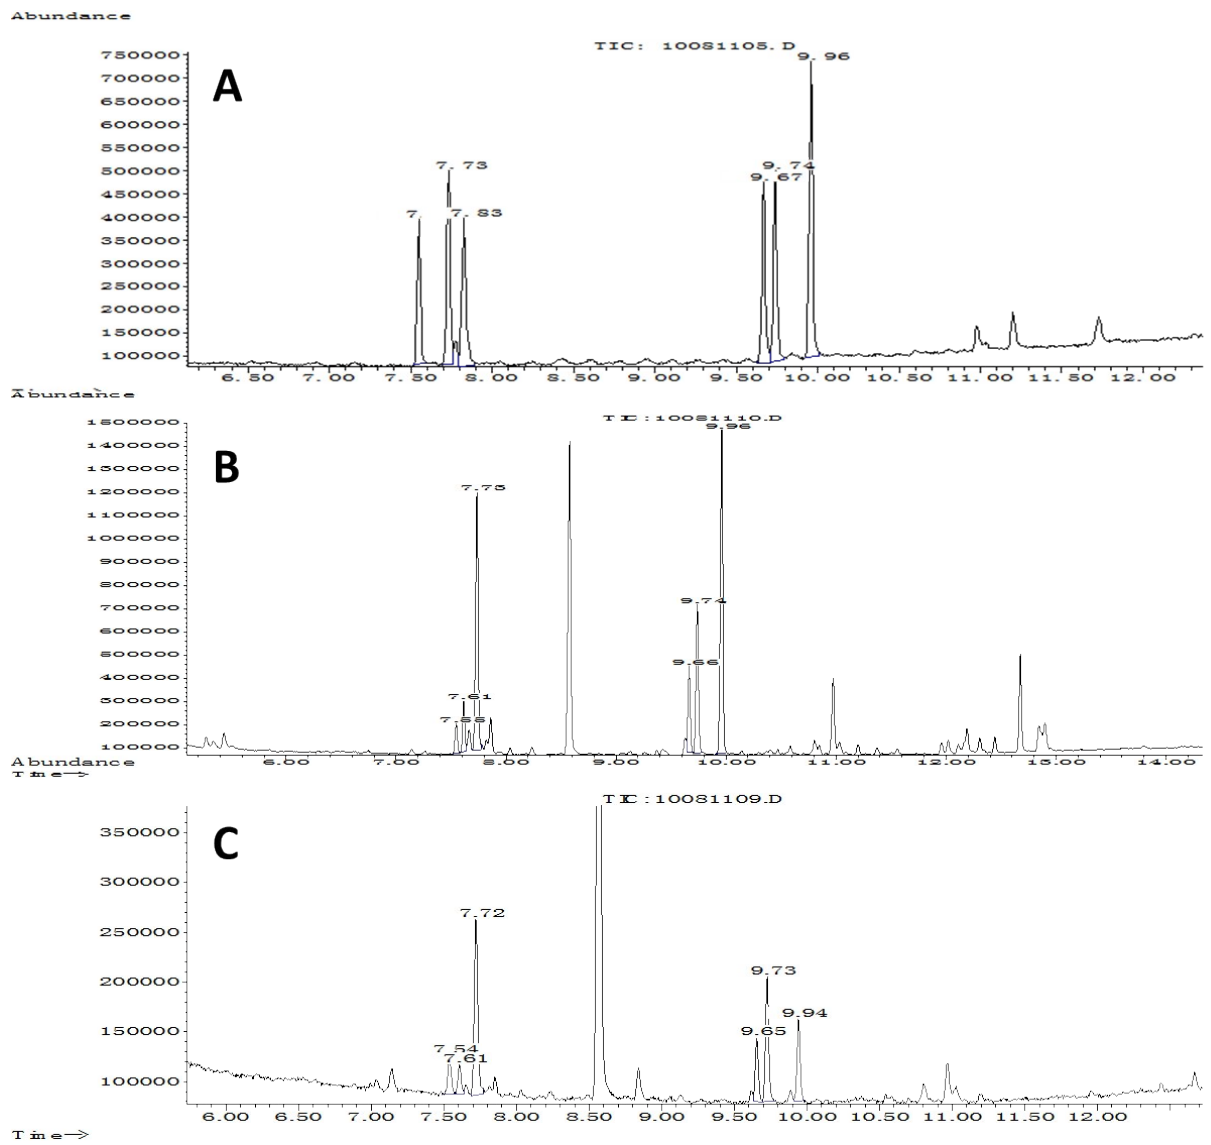

Supplement: c6ra20505d1.pdf [file c6ra20505d1.pdf]
